# Supplementary material
Source: PubMed Central journal article supplement (PMC5470504)
Supplement: PEDS_20164114SupplementaryData.pdf [file PEDS_20164114SupplementaryData.pdf]

# Supplemental Information

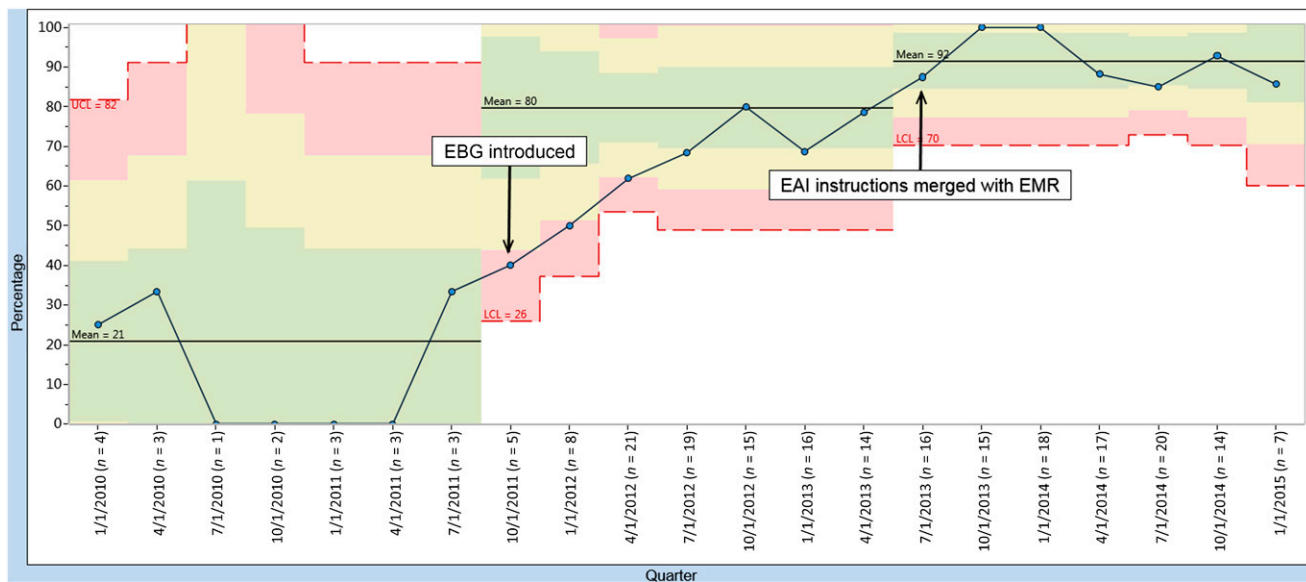

**SUPPLEMENTAL FIGURE 5**

Statistical process control chart showing percentage of patients who received teaching on how to use an EAI before and after EBG introduction. Control limits set at 3-σ. Special variations detected after EBG introduction and EAI instructions merged with the EHR. LCL, lower control limit; UCL, upper control limit.

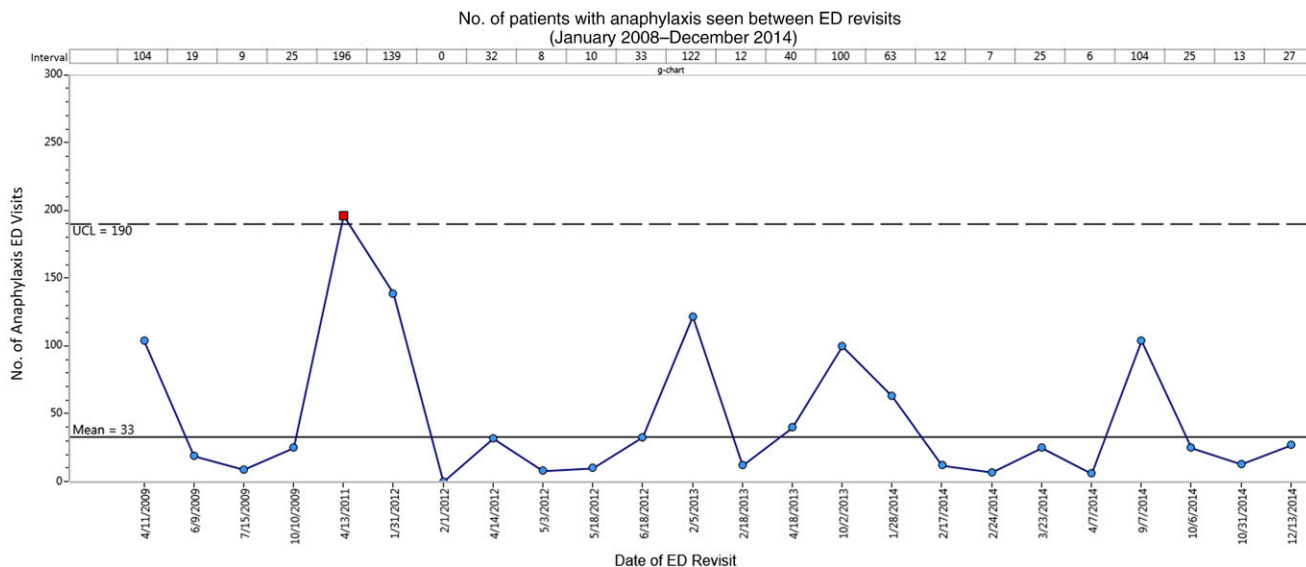

**SUPPLEMENTAL FIGURE 6**

G-chart showing 72-hour revisit rate of patients with anaphylaxis to our ED against number of patients between revisits.
